# Supplementary material for: Trends in the erythemal radiant exposure from re-evaluated measurements (1976–2023) with biometers at Belsk, Poland, and their sources from corresponding ozone, aerosol, and cloud observations
Source: Copernicus journal article supplement (doi:10.5194/egusphere-2025-1129), 2025-03-14
Supplement: Supplementary file [file egusphere-2025-1129-AC2-supplement.pdf]

## Response to the Reviewer 2 (reviewer text is in *italic*)

*The paper ‘Trends in the erythemal radiant exposure from re-evaluated measurements (1976–2023) with biometers at Belsk, Poland, and their sources from corresponding ozone, aerosol, and cloud observations ; by Czerwinska et al., investigates a time series of erythemal solar irradiance 1976-2023 in Belsk, Poland and analyses trends and potential factors influencing it. This topic is very relevant for a better understanding of the evolution of solar uv radiation received at the surface, in particular if there is an increasing or decreasing trend and which factors possibly influence this evolution. The strength of the paper is that the influencing factors like total ozone, aerosol load, cloud coverage are taken into account by several statistical means and time scales. The manuscript is fitting into the scope of Atmospheric Chemistry and Physics. The manuscript is well written and I can recommend publication for ACP after some revision, described below.*

### **General comments:**

*The authors claim that their time series of homogenized erythemal uv dose is the longest globally. This should be substantiated by giving at least some references of other relevant long time series and respective references.*

Some of the time series are listed and referred to in the article in ESSD (Krzyścin et al., 2025). As these two articles come together, only the brief statement was added to the text in (L. 58-60):

“Time series of UV ground-based measurements longer than four decades are very rare. They are not erythemally weighted (Chubarova et al., 2000) or do not come from biometers, but rather spectral measurements (NDACC, 2025, WOUDC, 2025).”

*The authors should give for their instruments used for deriving the Erythemal Radiant Exposure (ERE) the wavelength range measured, mentioning also ‘broadband’ (or spectral in case), this could e.g. be integrated in table 1. It should be indicated if these sensors used by the authors have been calibrated regularly against reference standards.*

All of the ERE meters used in this study were erythemal broadband meters. The only exception is the Brewer Spectrophotometer #64, which was used for regular calibration since 2013, but the data from this instrument was not used in this paper. Thus, all ERE measurements come from broadband meters in this study. Wavelength ranges were added in the Table 1. The detailed information about biometers’ calibration can be found in the co-article in ESSD (Krzyścin et al., 2025).

*The authors explain (also via the co-article in ESSD) that the quality of the ERE time series of the KZ sensors was accessed by checking with ERE observations of the Brewer #64. The Brewer has however another uv range measured. How was the ERE therefore derived in order to assure comparability? Further, for the Brewer#64: in section 2.2, Ancillary data, it is not included in the TCO3 database? Why?*

The following explanation has been added in the text (L. 55-58):

“The SHICRivm algorithm is used for quality checks and to extend the Brewer spectra to 400 nm (Slaper et al, 1995). To retrieve daily erythemal radiant exposures for comparison with KZ, spectra are weighted with the CIE erythemal action spectrum (CIE 2019) and integrated over wavelengths (from 280 to 400 nm) and time (sunrise to sunset).”

We did not use the TCO3 from Brewer measurements, as the data is not available since the beginning of ERE measurements. Furthermore, the Dobson measurements have been quality checked since the beginning of the TCO3 observations in 1963. The data from Brewer has many loopholes and overlaps with Dobson, thus it was not included in this database.

*The introduction should also include a WMO definition of the erythemal (uv) irradiance and its relation to the commonly communicated uv index.*

The following text has been added in the text (L. 40-42):

“Erythemal UV irradiance is the intensity of UV radiation that causes sunburn, i.e., UV spectrum weighted with action spectrum of erythema (sunburn) appearance and integrated over the wavelength range from 280 to 400 nm. The commonly used 1 UV Index is equivalent to 25 mW m<sup>-2</sup> of erythemal UV irradiance (WHO, 2002).”

### **Specific comments:**

*Line 50: the Brewer #64 spectrophotometer is mentioned here, but not a bit further above in the list of instruments used for monitoring important parameters; The Brewer should also be listed there briefly (since when, where?). Or was its data not used any further?*

The data was used only for checking the quality of KZ meter's measurements (in this study), thus the Brewer is mentioned only briefly in the introduction.

*Lines 76-77: 'the months 1985 (June and July) were excluded' ....: what does this mean? Only for the year 1985, or for all years these two months? If June and July have been excluded for all years, then it would be necessary to do the same calculations once with including them in order to check the uncertainty budget. If only 1985, then why this year?*

It was only in 1985 because there was a lack of data in June and July. Thus, it was not possible to count the monthly erythemal radiant exposure for those months, and filling the gap with the long-term mean for the months that contribute the most to the yearly mean seems to be inappropriate. The sentence was corrected to make it more clear (L. 92-94): “The months of 1985 (June and July) were excluded from the analyses because of the lack of data, and replacing them with long-term monthly means seems to be incorrect, as UVR in these months contributes mostly to the annual ERE.”

*Section 2.2 Ancillary Data: It should be more detailed how the time series for these individual influencing factors have been assured to be homogeneous; e.g. the TCO3 between Dobson and satellite observations, and the G<sub>o</sub> values (if ECMWF or from MERRA-2)? How was it decided to take the one or the other? In case of AOD from Aeronet – which data level has been taken? SunDur: 'percentage of daily duration': daily duration means from sunrise to sunset, or fixed day duration?*

As for TCO3, in ESSD paper (Krzyścin et al. 2025) we explained in more details the code flags for TCO3 and how the series was constructed. Dobson results represent more than 90% of the time series. Satellite measurements are in good agreement with Dobson measurements, i.e., the mean relative difference is less than 1%. As for G0, we compared measured G for cloudless sky conditions at Belsk with G0 from MERRA-2 and ERA5. We found that the best fit was for the mean values of MERRA-2 and ERA5. Before 1980, we used ERA5, but the data was corrected with the mean bias. In case of AOD, we used data level 2.0. Daily duration means from sunrise to sunset. These details were added in the paper in lines: 100-101, 103-104, 106, 109-111.

*Lines 101-105: The formulation why to take years 1999/2000 as turning point can be improved. Later on, the authors give more details (lines 135-139), but at this place here, it is a bit confusing (especially the formulation 'somewhere in between'). When looking at the values in table 3, the R2 value for year 2000 is always lower (in one case equal) than the R2max for another year – although in line 137 it is stated to choose the year with R2 max. It feels thus that the choice for years 1999/2000 needs an improved motivation. E.g. volcano eruptions (Pinatubo, ...), enter into force of the Montreal Protocol, instrumental issues, further statistical change point analysis....*

Values of R2 for the months with statistically significant trends, are not lower for R2000 of more than 0.05 than for R2max, and for yearly values the difference is only 0.01, while for seasonal, the R2 values are the same. As the differences are so small, we chose the year 2000 as the turning point, to choose the same turning point for all time series, while the Tmax would be different for each time series. The statement in line 137 (now line 161) is not correct and was improved. The word “selected” was changed to “calculated”. We also changed the previous fragment to: “Our first guess was that a linear trend for the whole period 1976–2023 would not be applicable because of a trend shift in the annual ERE, visible in the smoothed data, that occurred between the years 1995–2015. The year 2000 was chosen as the trend-turning year that divided the whole observing period into two sub-periods (1976–1999 and 2000–2023) with equal length, and also to choose the same turning point for each time series. The effect of this selection on the trend values is discussed further in this Section.” (L. 125-129)

*Lines 184-188: In addition to the comments of the other reviewer: How valid is the assumption that AOD at 340 nm is representative for the UV-B range? There should be some discussion on it, including some references to measurements of AOD in the UV-B.*

The discussion was added (L. 465-474): “At first glance, the proposed indices to explain changes in annual and seasonal (summer) erythema exposure appear to be only loosely related to the UV radiation attenuation in the atmosphere. To account for the effect of aerosols, the daily averaged AOD340 nm was used with an Ångström exponent of 0 across the UV range, while other features were held constant. SunDur, G and CI (i.e. parameters related to global solar radiation rather than UV radiation) were chosen to account for the influence of clouds. In addition, a constant surface albedo of 0.03 was used throughout the year. However, this choice of UV indices ensured excellent agreement between modelled and observed annual ERE, as shown in Fig.6 where the smoothed modelled (GPRall, blue solid curve) and observed (black solid curve) curves were almost superimposed on each other. The descriptive statistics of the relative differences between the model and observations are –0.04%, 0.89%, 0.98% and 1.25% for mean, mean absolute value, correlation coefficient and standard

deviation, respectively. These values also confirm the effectiveness of using a limited number of proxies in analyses of long-term variability in surface UV radiation.”

*Line 360, table 9: Would it be possible to increase readability? It is not intuitive to read connected numbers so easily*

The table was changed to increase readability.

*Line 379: ‘neighbouring stations: do the authors mean Hradec Kralove and Lindenberg? Then this should be clarified (‘these neighbouring ...’)*

Yes, it was clarified.

*Lines 383-385: For the mentioned numbers for Reading and Sodankylä – please clarify to which reference these belong*

The reference is given in the previous sentence, i.e. Fountoulakis et al. 2020 (<https://doi.org/10.3390/environments7010001>). “Fountoulakis et al. (2020) found that local effects mainly related to the aerosols, albedo, and cloud changes in Europe, were important in shaping the UVR trend. In the case of Reading (51.4° N, 0.9° W), UK, and Sodankylä (67.4° N, 26.6° E), Finland, downward trends in the 307.5nm irradiance were even found between 1996 and 2017.”

*Discussion section on uv trends: Are there references for trend analyses reaching further than the ones mentioned? E.g.: <https://doi.org/10.5194/acp-22-12827-2022>; <https://doi.org/10.5194/acp-21-18689-2021>; <https://doi.org/10.1007/s43630-024-00658-8>; <https://doi.org/10.1002/joc.7803>*

Most of the proposed references were added into the discussion (L. 430-435):

“This conclusion aligns with other studies. Fountoulakis et al. (2021) found that in 2006-2020, the levels of UV irradiance at Aosta, Rome and Lampedusa (Italy) increased mainly due to changes in cloud clouds or/and aerosol. Lorenz et al. (2024) also attribute the increasing trend in erythemal UV radiation in Dortmund (Germany) in 1997-2022 to a change in cloud cover as the primary driver. In the reconstructed series in Novi Sad (Serbia) in 1971-2018, Malinović-Milićević et al. (2022) found that there were no significant trends in the last two decades, but there was an increase in the number of days with high daily radiant exposures. The authors also stated that the cloud cover had more influence than TCO<sub>3</sub>.”

*Lines 402-411: this paragraph fits rather to the conclusions, as it describes the results rather than to discuss them*

The part of the paragraph was moved to the conclusions (L. 480-482), but most of it, in the authors’ opinion, fits better in the discussion because of too many details. This conclusion is further discussed with other studies, suggested by the Reviewer (L. 424-435).

*Lines 418-419: Is there a source reference for the statement that the atmosphere over Belsk was getting cleaner?*

Yes, Posyniak et al., 2016 (<https://doi.org/10.1515/acgeo-2016-0026>)

*Line 423: ‘red circles and blue crosses’: these are not the physical entities behind; please write out the meant individual factors/proxies.*

The sentence was changed to: “This is defined as the square root of the mean square of the difference between the linear and non-linear model values, represented by the red circles and blue crosses in Fig. 6 and Fig. 7.” (L. 458-460)

*Lines 435-437: why should there no further increase of UVR be expectable? Total ozone is highly variable, also atmospheric aerosol load and how these factors will change is not determined, in particular taking climate change into account. Climate change is also expected to impact on cloud cover. Overall warmer temperatures and a purer atmosphere support less cloud cover.*

The authors agree with the Reviewer and changed the sentence in the conclusions to: “The positive UVR trend in the 1980s and 1990s was a specific superposition of stratospheric ozone, aerosol and cloud effects.” (L.484-485)

***Technical comments:***

*Line 88 and in figure 1 caption: define CI for the clearness index*

*Line 126: please change to ‘The largest differences ...’*

*Line 282: ‘... in the per cent ...’ please skip the ‘the’*

*Line 288ff: ‘ozone & aerosols’; better write ‘combined ozone and aerosol impact’ or similar*

*Line 324: in brackets: (approximately between 0.8 to 0.9)*

*Line 325: skip ‘per cent’ (% already there)*

*Line 378: please change to ‘Republic and Lindenberg’*

*Line 383: please rephrase: ‘mainly related to the changes in aerosol load, albedo and cloud cover ...’*

All the changes from technical comments were applied.
